# Supplementary material for: Rice Genome Resequencing Reveals a Major Quantitative Trait Locus for Resistance to Bakanae Disease Caused by Fusarium fujikuroi
Source: PubMed Central journal article supplement (PMC6566380; doi:10.3390/ijms20102598), 2019-05-27
Supplement: ijms-20-02598-s001.pdf [file ijms-20-02598-s001.pdf]

Table S1. Distribution of DNA polymorphisms between ‘Junam’ and ‘Samgwang’ over chromosomes.

|       | SNP     | InDel* | Sum     |
|-------|---------|--------|---------|
| Chr1  | 8,371   | 897    | 9,268   |
| Chr2  | 10,129  | 964    | 11,093  |
| Chr3  | 7,615   | 600    | 8,215   |
| Chr4  | 6,441   | 570    | 7,011   |
| Chr5  | 2,479   | 293    | 2,772   |
| Chr6  | 5,032   | 417    | 5,449   |
| Chr7  | 15,620  | 1,532  | 17,152  |
| Chr8  | 1,732   | 292    | 2,024   |
| Chr9  | 6,527   | 475    | 7,002   |
| Chr10 | 12,843  | 1,190  | 14,033  |
| Chr11 | 51,628  | 3,282  | 54,910  |
| Chr12 | 11,901  | 1,086  | 12,987  |
| Total | 140,318 | 11,598 | 151,916 |

\* InDel is the abbreviation of insertion/deletion.

**Table S2.** Identification of QTLs for BD resistance using KASP markers

| QTL name     | chromosome | location (cM) | closest marker  | QTL interval* (cM) | LOD  | additive effect | dominance effect | R <sup>2</sup> |
|--------------|------------|---------------|-----------------|--------------------|------|-----------------|------------------|----------------|
| <i>qFfR9</i> | 9          | 29.2          | <i>KJ09_024</i> | 28.1-30.1          | 60.3 | 35.15           | -1.27            | 0.59           |

\* interval at 95% probability

Table S3. List of developed CAPS and dCAPS markers

| No. | marker name | physical location |                            | primer sequence         |                      | restriction enzyme | Marker type |
|-----|-------------|-------------------|----------------------------|-------------------------|----------------------|--------------------|-------------|
|     |             | Chromosome number | distance from the top (bp) | forward                 | reverse              |                    |             |
| 1   | 9FC1        | 9                 | 6,760,046                  | ACAACGAGAGGGATGGTGT     | GGGTTCAACAAAGATCCAGA | PshBI              | CAPS        |
| 2   | 9FC5        | 9                 | 6,835,396                  | CACATGGTGAAAAGACATGG    | TAGTGTGCAAAGCAGGACAA | PvuII              | CAPS        |
| 3   | 9FC7        | 9                 | 6,904,230                  | GGATGTTTTCTTTCTGATGACC  | TAAGCCGTCATGTGGCACTA | XbaI               | CAPS        |
| 4   | 9FC9        | 9                 | 6,966,618                  | GCTTAACGCCGAGAGCTAGT    | TCTAACAAAGTGGCATCACG | EcoRV              | CAPS        |
| 5   | 9FC10       | 9                 | 7,149,210                  | GTCCATTCCACCCTTACGTT    | TTGATTGGGGTTGAAGATA  | EcoRV              | CAPS        |
| 6   | 9FC13       | 9                 | 7,182,057                  | TGCCATCATGAGTTGAAATG    | AAAGGTCACCAGTGTGGAAA | PvuII              | CAPS        |
| 7   | 9FC14       | 9                 | 7,239,467                  | GGGGTAAAATGTGTTTGTGC    | CTTGGGCTTTGTTTGTGAAC | PshBI              | CAPS        |
| 8   | 9FC30       | 9                 | 7,511,494                  | TGGAAGAAGAAAAGTAGGGAGA  | ATAACGAAGCAGTCCCCAAA | HindIII            | CAPS        |
| 9   | JS9M6       | 9                 | 14,581,727                 | AGAATGTAAGTCATTCTAGCAGA | TGGTTAGCCTCATCGTAGAC | BglII              | dCAPS       |

TC

Table S4. Number of DNA polymorphisms in the genic region of genes located in the *qFfr9* region.

| No. | gene ID      | start*  | end**   | Orientation *** | 5'<br>UTR | NS**** | SY***** | intron | 3'UTR | sum | gene description                                              |
|-----|--------------|---------|---------|-----------------|-----------|--------|---------|--------|-------|-----|---------------------------------------------------------------|
| 1   | Os09g0298100 | 7240336 | 7244713 | +               | 0         | 0      | 1       | 0      | 0     | 1   | Similar to predicted protein                                  |
| 2   | Os09g0298200 | 7245434 | 7249813 | -               | 0         | 0      | 0       | 0      | 0     | 0   | Similar to Brittle 2                                          |
| 3   | Os09g0298266 | 7245518 | 7247867 | +               | 0         | 0      | 0       | 1      | 0     | 1   | Hypothetical gene                                             |
| 4   | Os09g0298332 | 7262920 | 7263701 | +               | 4         | 5      | 3       | 4      | 1     | 17  | Conserved hypothetical protein                                |
| 5   | Os09g0298400 | 7271228 | 7276768 | +               | 1         | 2      | 0       | 18     | 0     | 21  | WD40/YVTN repeat-like domain containing protein               |
| 6   | Os09g0298500 | 7277255 | 7282211 | -               | 0         | 1      | 1       | 2      | 0     | 4   | Zinc finger RING/FYVE/PHD-type domain containing protein      |
| 7   | Os09g0298700 | 7293013 | 7300542 | -               | 0         | 4      | 7       | 14 (1) | 0     | 25  | Nucleotide-binding alpha-beta plait domain containing protein |
| 8   | Os09g0299000 | 7316075 | 7322207 | +               | 0         | 0      | 0       | 18 (2) | 7     | 25  | Similar to CDPK substrate protein 1                           |
| 9   | Os09g0299200 | 7329560 | 7333289 | +               | 0         | 1      | 0       | 4      | 0     | 5   | Similar to MYB-CC type transfactor                            |
| 10  | Os09g0299300 | 7334523 | 7335240 | +               | 0         | 0      | 0       | 4      | 2     | 6   | Similar to predicted protein                                  |
| 11  | Os09g0299400 | 7336243 | 7340325 | -               | 0         | 1      | 4       | 9 (2)  | 0     | 14  | Similar to TPK1                                               |

|       |              |         |         |   |    |    |    |     |    |     |                                                         |
|-------|--------------|---------|---------|---|----|----|----|-----|----|-----|---------------------------------------------------------|
| 12    | Os09g0299500 | 7347444 | 7351867 | - | 0  | 1  | 1  | 13  | 3  | 18  | Similar to predicted protein                            |
| 13    | Os09g0300800 | 7470846 | 7483164 | + | 0  | 0  | 0  | 25  | 2  | 27  | Protein of unknown function DUF247 plant family protein |
| 14    | Os09g0301800 | 7519040 | 7523188 | + | 10 | 2  | 1  | 0   | 1  | 14  | Hypothetical conserved gene                             |
| 15    | Os09g0302233 | 7536715 | 7539761 | + | 0  | 0  | 0  | 30  | 0  | 30  | Similar to Zinc knuckle domain-like                     |
| Total |              |         |         |   | 15 | 17 | 18 | 142 | 16 | 208 |                                                         |

\* start position of the gene in reference genome

\*\* end position of the gene in reference genome

\*\*\* orientation of the gene in reference genome

\*\*\*\* non-synonymous SNP

\*\*\*\*\* synonymous SNP

\*\*\*\*\* Among the total 208 DNA polymorphisms, 203 DNA polymorphisms were SNPs, and 5 DNA polymorphisms were InDels. All of the InDels were located in introns.

The number of InDels were shown in parentheses.

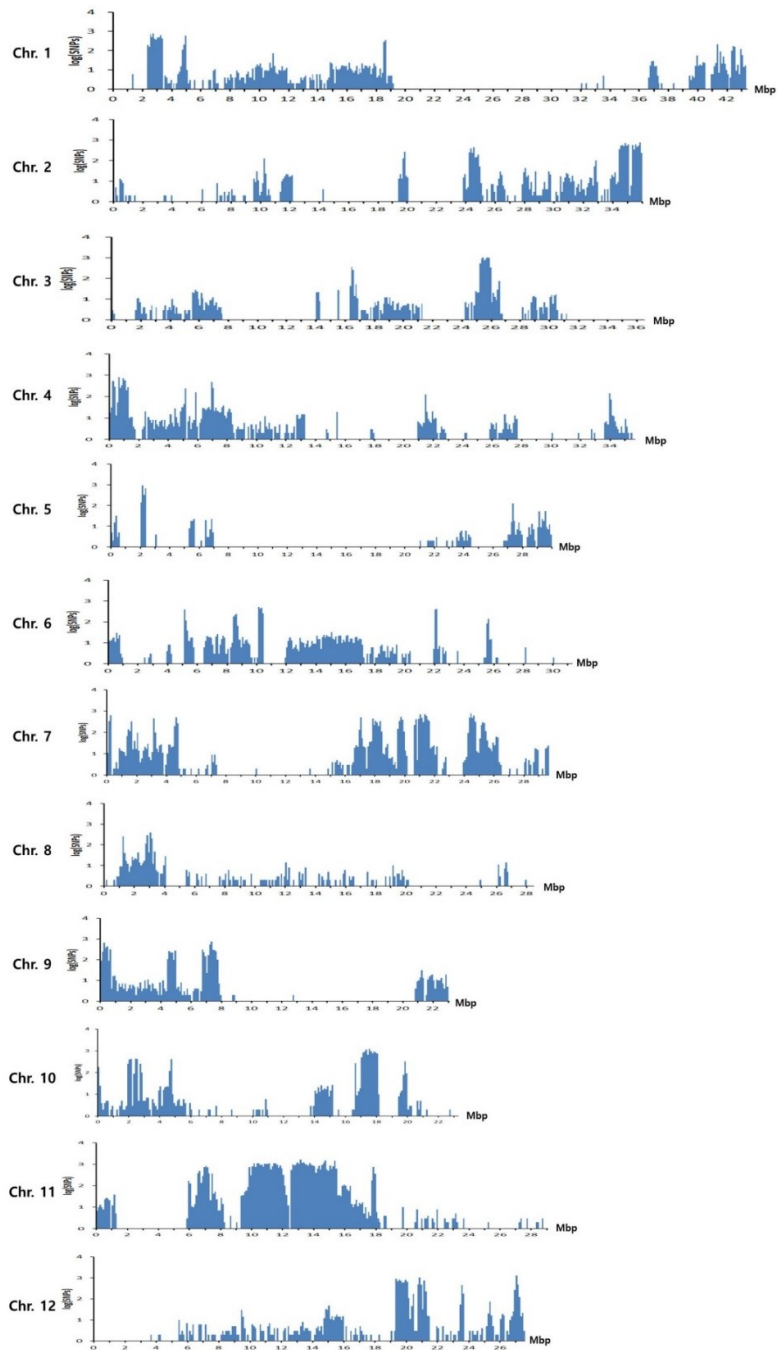

**Figure S1** The distribution of DNA polymorphisms per 100 kb in the 12 chromosomes between the Junam and Samgwang rice varieties. X-axis represents the physical distance along each chromosome in mega base-pair (Mb) units; Y-axis indicates the common logarithm of the number of DNA polymorphisms.

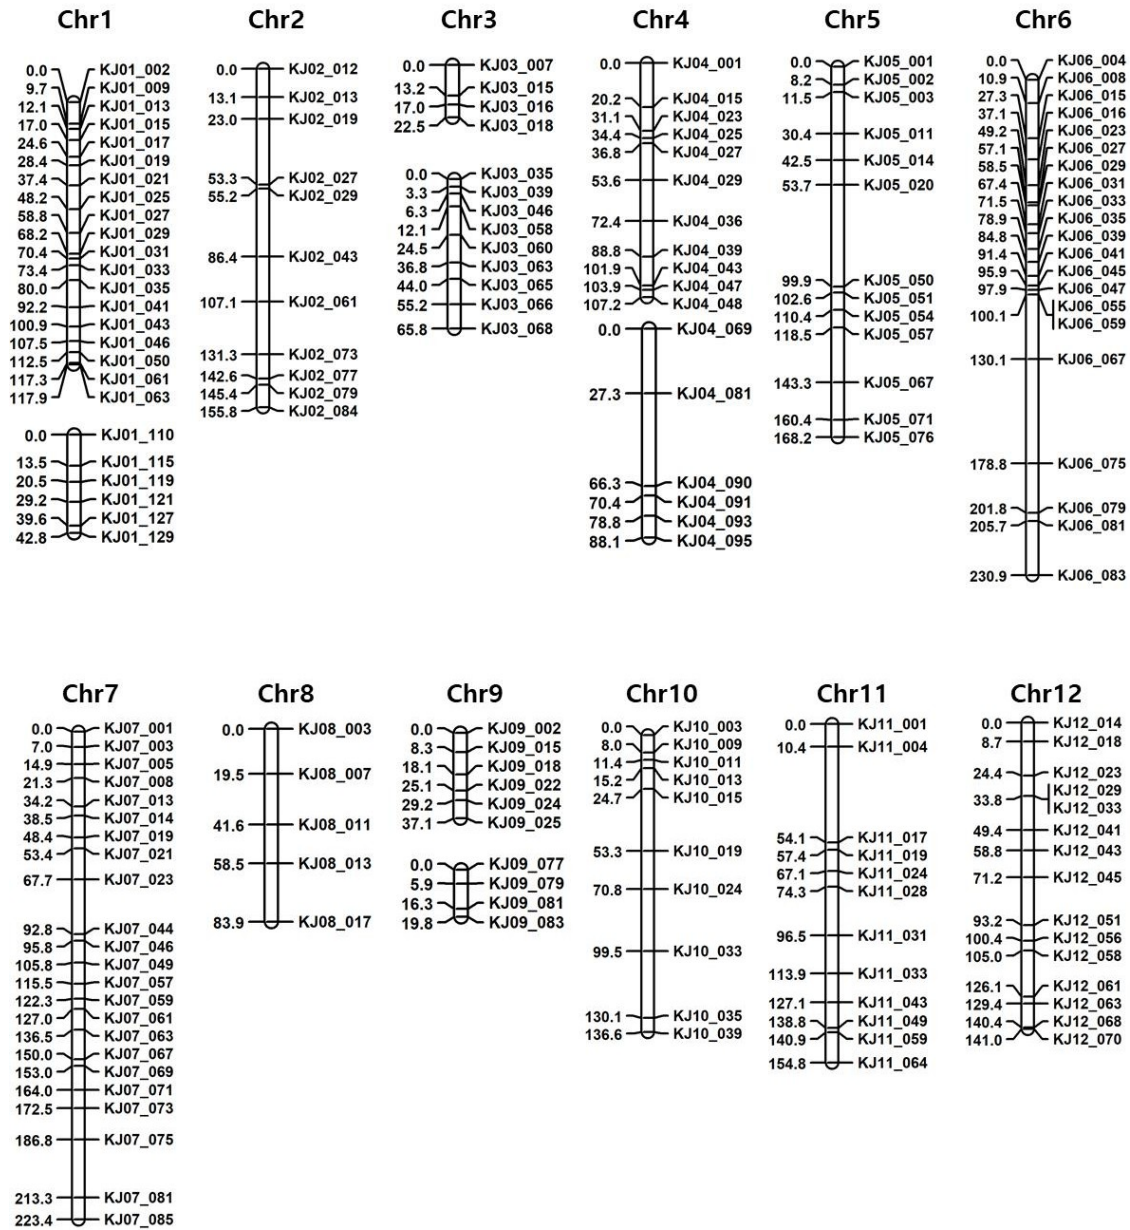

**Figure S2** A genetic map constructed using KASP markers with the F2 plants derived from crossing of Junan and Samgwang varieties. The chromosome numbers are indicated on top of each chromosome, the name of each marker is indicated on the right-hand side of each chromosome, and the genetic distance of each marker from the first marker at the top of each chromosome is shown on the left-hand side. Genetic distances, measured as centimorgan or cM, were calculated using the Kosambi function. In each chromosome, the linkage groups were separated where the distance between adjacent markers exceeded 50 cM.

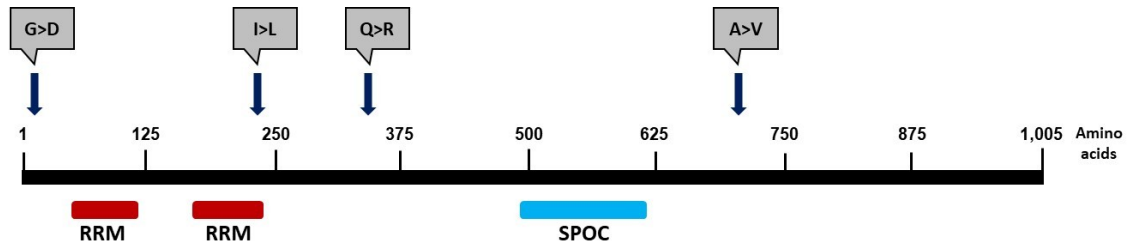

**Figure S3** The domain structure of the deduced protein of Os09g0298700.

The RRM and SPOC domains are shown under the bar representing the length of the protein. RRM: RNA recognition domain. SPOC: Spen paralogue and orthologue C-terminal domain. The locations of amino acid changes between Junam and Samgwang are indicated by indigo arrows, and differences in amino acid were shown above the arrows.
